# Supplementary material
Source: PubMed Central journal article supplement (PMC3819407)

## Supplemental Information

**Hepatic fibrosis, previous use of bupropion, and a history of smoking are associated with weight loss outcomes after Roux-en-Y gastric bypass surgery.**  
Still, et al.

The Supplemental materials have the following sections in order:

1. Methods.
2. Variable List. Descriptive summary of clinical variables analyzed.
3. Table S1. Descriptive summary of the weight loss measures.
4. Table S2. Significant predictors of less weight loss in the BMI adjusted univariate analysis for weight loss at each of the three temporal phases.
5. Table S3. Significant predictors of less weight loss in the BMI adjusted univariate analysis for weight loss at each of the three temporal phases.
6. Table S4. Significant predictors of less weight loss in the BMI adjusted univariate analysis for weight loss at each of the three temporal phases.
7. Table S5. Significant predictors of less weight loss in the BMI adjusted univariate analysis for weight loss at each of the three temporal phases.
8. Table S6. Significant predictors of less weight loss in the BMI adjusted univariate analysis for weight loss at each of the three temporal phases.
9. Table S7. Significant predictors of less weight loss in the preliminary models in common for all three weight loss phases.
10. Regression equations from early weight loss and weight loss nadir.
11. Figure S1. Scatterplot matrix for correlations among short-term, nadir, and long-term weight loss outcomes.
12. Figure S2. Residual plot for long-term weight loss equation.

## Supplementary Methods.

Since 2001, all patients undergoing bariatric surgery at Geisinger Medical Center have been required to participate in a standardized multidisciplinary preoperative program that encompasses medical, psychological, nutritional, and surgical interventions and education. Patients must be tobacco free (documented by serum nicotine levels) for at least 6 months prior to the operation. Patients must also attend 2 educational sessions. A clinical nurse specialist, dietitian, and psychologist lead the first class. The second class is conducted by a bariatric surgeon. Additionally, the patients are required to read a book about bariatric surgery, complete 10 behavior modules, attend 2 support group meetings, and attempt to achieve a 10% weight loss of excess body weight. All of this must happen prior to any surgical intervention.

Initial pre-operative weight loss was attempted through an approximate 500-kcal deficit from estimated calories consumed as determined by a registered dietitian. The macronutrient composition was a prudent low-fat diet. If patients following the diet had not reached their weight loss goal by month 4, they were instructed to follow a 1000- to 1500-kcal liquid diet. In addition, patients were encouraged to wear a pedometer and walk at least 8000 steps per day and drink at least 1.92 L of water daily, while avoiding caloric beverages. Monthly behavior modification modules were also reviewed with patients.

The following data were used for the study:

- Baseline information: Length of time in pre-operative program, assessment and recommendations from the initial dietetic and psychological evaluation (rated as major issues, minor issues, or no issues to address).
- Demographics: Age at surgery, gender, race, education, marital status, income, number of children, smoking history (smoked at least 100 cigarettes in their lifetime), and alcohol use (drink alcohol monthly or more).
- Body metrics: Height, weight and BMI at baseline visit, weight and BMI immediately prior to surgery, amount of pre-operative excess weight loss, waist circumference, resting energy expenditure, and VO2Max.
- Co-morbidities: Diagnoses on each patient's active problem list during the pre-operative period. To simplify the analysis, these were rolled up into 3-digit ICD-9 codes and those that occurred in at least 2% of the population were considered for analysis (resulting in 50 co-morbidity variables).
- Medication use: Medications that were listed as active during the pre-operative period. The medications were structured using MediSpan® prescription classifications and were rolled up into medication subclass categories. The subclasses that were present in at least 2% of the population were retained, resulting in 92 medication variables.
- Laboratory results: All laboratory results prior to surgery that were found in at least 50% of the population. This resulted in 45 laboratory variables retained for analysis.

- Surveys: Individual item responses (N=100) and summary scores or sub-scores (N=18) for Beck Depression Inventory (BDI)<sup>R</sup>, Family Emotional Involvement and Criticism Scale (FEICS)<sup>R</sup>, Impact Of Weight On Quality Of Life-Lite (IWQOL)<sup>R</sup>, Weight Loss Readiness Test (WLR)<sup>R</sup>, and Questionnaire on Eating and Weight Patterns (QEWP)<sup>R</sup>.
- Perioperative information: Surgical access (laparoscopic versus open), surgeon
- Liver pathology: Routine liver biopsy specimens were formalin fixed and stained with hematoxylin and eosin for routine histology, Masson's trichrome for assessment of fibrosis (including type of fibrosis), and Perls'/Prussian Blue stain to determine iron status. All specimens were read by experienced pathologists using the criteria for NASH of Brunt.
- Postoperative information: All weight measurements (with time from surgery) occurring before a post-operative pregnancy (when present) or a revision surgery (when present). All weight measures were used regardless if they were collected from the Weight Management Clinic or other Geisinger Clinic locations.

Early weight loss: For the analyses of early weight loss, the study population was limited to the subset of patients with adequate follow-up during the time immediately following surgery (at least 4 weight measurements). The %EBWL measured at each visit were included as the predictor variable in slopes and intercepts regression models (using random effects in SAS proc mixed). The equation generated from this model was used

to calculate the %EBWL at 6-months post-surgery, which was used as the dependent variable in a multiple linear regression model for clinical predictors of early weight loss.

Weight loss nadir: The maximum weight loss during the first 36 months after surgery was identified. The analysis was limited to the subset of patients that had at least 3 weight measures occurring between 6-months and 36-months after surgery. The weight loss nadir cohort was further limited to the patients with at least one additional weight measurement occurring 30 days after the nadir weight (but before 36 months) that was greater than or equal to the nadir weight (i.e. confirming that the weight reached a nadir and was leveling off or starting to increase). This long term weight measure was used as the dependent variables in a multiple linear regression model for clinical predictors of weight loss.

Long term weight loss: The analysis of long term weight loss was limited to the subset of patients that qualified for the short term weight loss models and had at least one follow-up weight measurement occurring 36-months after surgery. For those with multiple measurements, that weight closest to 36-months was selected and used to calculate %EBWL. This long term weight measure was used as the dependent variables in a multiple linear regression model for clinical predictors of weight loss.

Regression analysis: A manual, forward, stepwise approach was used to identify the set of clinical variables that independently predicted each temporal weight loss phase. A subset of variables were selected for consideration in the multivariate model after

evaluating the strength of associations in preliminary models (univariate model  $p$ -value $<0.10$ ), their correlations with other variables already under consideration, and, in the case of categorical predictor variables, the frequency of occurrence. For model building, variables that had previously been associated with RYGB weight loss (i.e. in other published work) and had significant univariate associations ( $p<0.05$ ) were added to initial multivariate models. Other variables were added in a stepwise fashion based on strength of association ( $p<0.05$ ) until none of the remaining variables were significant when added to the model.

Instead of omitting data via listwise deletion of patients with missing data for laboratory result and survey variables, the statistical models included additional variables for whether or not the lab test/survey was conducted. This provided a method for estimating the effect of having (or not having) a resulted test while simultaneously evaluating the relationship between the test/survey result and the outcome. Continuous covariates were checked for non-linearity by categorizing the data into groups (for example, using quartiles of the distribution or scientifically valid cutoff values). Effect modifiers were evaluated by testing for significance of interaction terms between clinical variables. Since all outcome measures were approximately normally distributed, parametric statistical methods were appropriate for use. All tests were two-sided and  $p < 0.05$  was considered significant. SAS version 9.2 (SAS Institute, Cary, NC) was used for statistical analyses.

**Baseline information and demographics**

- Gender
- Ethnic group
- Age
- Education
- Marital Status
- Income
- Children
- Height
- Weight at baseline
- BMI at baseline
- Waist circumference
- REE
- VO2max
- Rating from initial dietician evaluation (red, yellow, green)
- Rating from initial psychological evaluation (red, yellow, green)
- Alcohol use
- Smoking history
- Weight immediately prior to surgery
- BMI immediately prior to surgery
- Days in pre-operative program

**Comorbidities on problem list from baseline to surgery using 3-digit ICD9, requiring 2% of population**

- ICD\_401
- ICD\_272
- ICD\_250
- ICD\_780
- ICD\_530
- ICD\_311
- ICD\_715
- ICD\_244
- ICD\_493
- ICD\_724
- ICD\_722
- ICD\_300
- ICD\_477
- ICD\_346
- ICD\_251
- ICD\_305
- ICD\_327
- ICD\_296
- ICD\_786
- ICD\_729
- ICD\_782
- ICD\_309
- ICD\_790
- ICD\_719
- ICD\_564
- ICD\_256
- ICD\_414
- ICD\_553
- ICD\_354
- ICD\_789
- ICD\_726
- ICD\_784
- ICD\_269
- ICD\_592
- ICD\_427

- ICD\_626
- ICD\_787
- ICD\_268
- ICD\_627
- ICD\_429
- ICD\_625
- ICD\_276
- ICD\_794
- ICD\_274
- ICD\_728
- ICD\_357
- ICD\_785
- ICD\_307
- ICD\_796
- ICD\_428

**Medications on reconciliation list from baseline to 1 month prior to surgery using subclass, requiring 2% of population**

- Biguanides
- NSAID
- PPI
- SSRI
- Statins
- OpioidAgonist
- OpioidCombo
- OilSolVit
- ACE
- Salicylates
- Sympath
- BBBS
- H2
- LoopDiur
- ThyroidHorm
- AnalgOther
- MultiVit
- Insulin
- AntihistNonsed
- Calcium
- Thiazides
- Benzod
- MuscleRelax
- AntiHTNcomb
- NasalSteroids
- AnticonvMisc
- SNRI
- Sulfonylureas
- InsSensAgents
- CCB
- Potassium
- Glucocort
- ARB
- Cough\_Cold\_AllComb
- AnorexNonAmph
- AntidepressMisc
- MultiVitMinerals
- CorticTopical
- WaterSolubleVitamins
- Heparin
- Azithromycin
- Aminopenicillins
- NonBarbitHypnotics
- SteroidInhalants
- LeukotrieneModulators
- Tricyclic

- AntifungalsTopical
- Iron
- SmokingDeterrents
- ComboContraceptOral
- FibrinAcid
- Fluoroquinolones
- Nitrates
- SerotoninAgonists
- AntiInfectiveMiscCombo
- Cephalosporins1stGen
- UrinaryAntispasmodics
- ModifiedCyclics
- PenicillinCombo
- DiureticCombo
- Tetracyclines
- AntiemetAnticholinergic
- AnticonvulsantsBenzod
- PlateAggrInhibitors
- Coumarin
- AntihyperlipidCombo
- PotSparingDiuretics
- AntiObesityAgents
- SurfactantLaxatives
- AntianxietyAgentsMisc
- ImidazoleRelAntifungal
- GoutAgents
- AntiparkinDopaminergic
- Cobalamins
- Dibenzapines
- Progestins
- IntesCholAbsorptionInhib
- Antitussives
- AntihistPhenothiazines
- Clarithromycin
- UlcerTherapyCombo
- Estrogens
- ProgestContraInjectable
- FolicAcidFolates
- BronchoAnticholinergics
- BulkLaxatives
- AntiInfectiveAgentsMisc
- AntiadrenergicAntiHTN
- BBNS
- GastrointestStimulants
- AnalgesicCombo
- IncretinMimetAgGLP1
- RDW
- PLATELET
- TSH
- TRIG
- CHOL
- HDL
- LDL
- CholHDLRat
- ALT
- AST
- AlkPhos
- TotBili
- MPV
- AnionGap
- Ferritin
- Iron
- IBC
- TransSat
- PTH
- FolicAcid
- Vitamin D 25 OH D2
- Vitamin D 25 OH D3
- Vitamin D 25 TOTAL
- Creatinine, RD Urine
- Protein, RD Urine
- Prot/Creat Ratio
- Zinc level

**Survey scores and individual item responses collected prior to surgery**

- BDI\_cognitive
- BDI\_somatic
- BDI\_total
- QOL\_PFScore
- QOL\_SEScore
- QOL\_SEXScore
- QOL\_PUBScore
- QOL\_WKScore
- QOLtotalscore
- FAMEI
- FAMC
- EP\_binge\_type
- WLR\_totatt
- WLR\_totcues
- WLR\_totemot
- WLR\_totcont
- WLR\_totbep
- WLR\_totex
- Habits-IMPORTANCE
- Habits-READINESS

**Perioperative information**

- Surgeon
- Access (Lap versus Open)

**Liver Pathology**

- Steatosis
- Lobular inflammation
- Perivascular fibrosis
- Portal fibrosis
- Bridging fibrosis
- Cirrhosis
- Ballooning
- Iron

**Labs prior to surgery found in >50% of population**

- glucose
- insulin
- hba1c
- bun
- sodium
- potassium
- CHLORIDE
- CO2
- creat
- calcium
- GFR
- WBC
- RBC
- HEMOGLOBIN
- HCT
- MCV
- MCH
- MCHC

**Table S1:** Descriptive summary of the %EBWL for each of the weight loss phases.

| <b>Time</b>           | <b>N</b> | <b>Mean (SD)</b> | <b>Median</b> | <b>[Q1, Q3]</b> | <b>[Range]</b> |
|-----------------------|----------|------------------|---------------|-----------------|----------------|
| Early weight loss     | 2365     | 64.7 (19.8)      | 62.9          | [50.8, 76.1]    | [-9.4, 185.3]  |
| Weight loss nadir     | 1369     | 76.8 (24.5)      | 75.1          | [59.3, 92.8]    | [7.4, 180.5]   |
| Long term weight loss | 857      | 61.3 (26.9)      | 59.4          | [41.9, 78.9]    | [-26.3, 173.8] |



**Table S2:** Significant predictors of worse outcome (i.e. lower early weight loss, lower weight loss nadir, higher weight regain) after controlling for baseline BMI.

|                               | Early weight loss | Weight loss nadir | Long term weight loss |
|-------------------------------|-------------------|-------------------|-----------------------|
| Demographics                  |                   |                   |                       |
| Age                           | Older             | Older             | Older                 |
| Gender                        |                   | Male              | Male                  |
| income                        | Lower             |                   |                       |
| Smoking history               | Non-smoker        |                   | Non-Smoker            |
| Baseline measures             |                   |                   |                       |
| Time from baseline to surgery | More time         | More time         |                       |
| Pre-surgical weight loss      | Lower             | Lower             |                       |
| Open versus laparoscopic      | Open              | Open              | Open                  |
| BMI at baseline               | Higher            | Higher            | Higher                |
| Diet light status             | Yellow/Red        |                   |                       |
| REE                           |                   | Higher            |                       |
| Waist circumference           | Higher            | Higher            | Higher                |
| Pathology                     |                   |                   |                       |
| Ballooning                    |                   | Any               |                       |
| Bridging Fibrosis             | Any               | Any               |                       |
| Cirrhosis                     | Any               | Yes               |                       |
| Lobular Inflammation          |                   | Any               |                       |
| Perivenular Fibrosis          | Any               | Any               | Any                   |
| Portal Fibrosis               | Any               | Any               |                       |
| Steatosis                     |                   | Any               | Any                   |
| Any fibrosis (2+)             | Any               | Any               | Any                   |

**Table S3:** Significant predictors of worse outcome (i.e. lower early weight loss, lower weight loss nadir, higher weight regain) after controlling for baseline BMI.

|                                        | Early weight loss | Weight loss nadir | Long term weight loss |
|----------------------------------------|-------------------|-------------------|-----------------------|
| Co-morbidities                         |                   |                   |                       |
| ICD_250 – diabetes                     | Yes               | Yes               | Yes                   |
| ICD_272 – lipids                       | Yes               | Yes               | Yes                   |
| ICD_346 – migraine                     |                   | No                | No                    |
| ICD_357 – toxic neuropathy             | Yes               | Yes               |                       |
| ICD_401 – hypertension                 | Yes               | Yes               |                       |
| ICD_414 – ischemic heart               | Yes               | Yes               |                       |
| ICD_427 – cardiac dysrhythmias         | Yes               |                   |                       |
| ICD_429 – other heart complication     | Yes               | Yes               |                       |
| ICD_530 – disease of esophagus         |                   | Yes               |                       |
| ICD_715 – osteoarthritis               | Yes               |                   |                       |
| ICD_719 – other joint disorder         |                   | No                |                       |
| ICD_722 – intervertebral disc disorder | Yes               |                   |                       |
| ICD_724 – Other back disorder          |                   |                   | No                    |
| ICD_780 – General symptoms             |                   | Yes               |                       |
| ICD_786 – respiratory symptoms         | Yes               |                   |                       |
| Number of co-morbidities               | More              |                   |                       |

**Table S4:** Significant predictors of worse outcome (i.e. lower early weight loss, lower weight loss nadir, higher weight regain) after controlling for baseline BMI.

|                               | Early weight loss | Weight loss nadir | Long term weight loss |
|-------------------------------|-------------------|-------------------|-----------------------|
| Medications                   |                   |                   |                       |
| med_ACE                       |                   | Yes               |                       |
| med_AnorexNonAmph             | Yes               |                   |                       |
| med_AntidepressMisc           |                   | No                | No                    |
| Med_AntifungalTopical         | Yes               |                   |                       |
| med_AntihistPhenothiazines    |                   | No                | No                    |
| med_AntiHTNcomb               | Yes               | Yes               |                       |
| med_AntiObesityAgents         | Yes               |                   |                       |
| Med_Antipark                  | Yes               |                   |                       |
| med_ARB                       |                   | Yes               |                       |
| med_BBCS                      | Yes               | Yes               |                       |
| Med_Benzodiazepine            |                   |                   | Yes                   |
| med_Biguanides                | Yes               | Yes               | Yes                   |
| med_Clarithromycin            |                   |                   | No                    |
| Med_ComboContraceptOral       | No                |                   |                       |
| med_Coumarin                  | Yes               |                   |                       |
| Med_Dipenzepazine             |                   |                   | No                    |
| Med_Diuretics                 | Yes               |                   |                       |
| Med_Fluoroquinolones          |                   |                   | No                    |
| Med_Glucocorticoid            |                   | No                | No                    |
| Med_Heparin                   |                   |                   | No                    |
| med_InsSensAgents             | Yes               | Yes               | Yes                   |
| med_Insulin                   | Yes               | Yes               |                       |
| Med_IntestCholAbsorptionInhib | Yes               |                   |                       |
| med_LoopDiur                  | Yes               | Yes               |                       |
| Med_ModifiedCyclic            |                   |                   | No                    |
| med_MultiVit                  | Yes               | Yes               |                       |
| med_MuscleRelax               |                   | Yes               | No                    |
| Med_Nitrates                  | Yes               |                   |                       |
| Med_OpioidCombo               | Yes               |                   | No                    |
| Med_plateAggrInhibitors       | Yes               |                   |                       |
| med_Potassium                 | Yes               | Yes               | Yes                   |
| med_Salicylates               | Yes               | Yes               |                       |
| med_SerotoninAgonists         |                   | No                |                       |
| Med_SSRI                      | Yes               |                   |                       |
| med_Statins                   | Yes               | Yes               |                       |
| med_Sulfonylureas             | Yes               | Yes               | Yes                   |
| med_SurfactantLaxatives       | Yes               | Yes               |                       |
| Med_Thyroid                   | Yes               |                   | Yes                   |
| Med_tricyclic                 | Yes               |                   | No                    |
| Med_urinaryAntispasmodics     | Yes               |                   |                       |
| Number of meds                | More              | More              |                       |

**Table S5:** Significant predictors of worse outcome (i.e. lower early weight loss, lower weight loss nadir, higher weight regain) after controlling for baseline BMI.

|                   | Early weight loss | Weight loss nadir | Long term weight loss |
|-------------------|-------------------|-------------------|-----------------------|
| Labs              |                   |                   |                       |
| AlkPhos           | Higher            |                   |                       |
| ALT               |                   | Higher            |                       |
| AST               |                   | Higher            |                       |
| Bun               | Higher            | Higher            |                       |
| CHLORIDE          | Lower             | Lower             |                       |
| CholHDLRat        | Lower             | Lower             |                       |
| CO2               | Higher            | Higher            |                       |
| Creatinine        | Higher            |                   |                       |
| Ferritin          | Lower             |                   |                       |
| GFR               | Lower             |                   |                       |
| Glucose           | Higher            | Higher            | Higher                |
| HbA1c             | Higher            | Higher            | Higher                |
| HDL               | Higher            |                   |                       |
| HEMOGLOBIN        | Lower             |                   |                       |
| Insulin           |                   | Higher            | Higher                |
| Iron              |                   | Lower             | Lower                 |
| LDL               | Lower             | Lower             |                       |
| MCHC              | Lower             |                   |                       |
| MPV               | Lower             |                   |                       |
| Platelet          |                   | Lower             | Lower                 |
| Potassium         | Higher            |                   |                       |
| PROTEINCREATRATIO | Higher            | Higher            | Higher                |
| PROTEINRDURINE    | Higher            | Higher            | Higher                |
| PTH               |                   |                   | Lower                 |
| RBC               | Lower             |                   |                       |
| RDW               | Higher            |                   |                       |
| Sodium            |                   |                   | Lower                 |
| TotBili           | Higher            | Higher            |                       |
| TransSat          |                   | Lower             |                       |
| ZINCLEVEL         | Lower             |                   |                       |

**Table S6:** Significant predictors of worse outcome (i.e. lower early weight loss, lower weight loss nadir, higher weight regain) after controlling for baseline BMI.

|                                  | Early weight loss | Weight loss nadir | Long term weight loss |
|----------------------------------|-------------------|-------------------|-----------------------|
| Beck depression inventory        |                   |                   |                       |
| Q11 – Agitation                  | No more agitated  | No more agitated  |                       |
| Q12 – Loss of interest           |                   |                   | Not lost interest     |
| Q15 – Loss of energy             | No energy         |                   |                       |
| Q21 – Interest in sex            | No change         |                   |                       |
| Cognitive subscore               |                   |                   | Higher score          |
| IW-QOL total score               |                   |                   |                       |
| PF total score                   | Lower PF          |                   |                       |
| PF Score Q1                      | Lower PF          | Lower PF          |                       |
| PF Score Q2                      | Lower PF          |                   |                       |
| PF Score Q3                      | Lower PF          |                   |                       |
| PF Score Q4                      | Lower PF          |                   |                       |
| PF Score Q6                      | Lower PF          |                   |                       |
| PF Score Q7                      | Lower PF          |                   | Lower PF              |
| PF Score Q8                      | Lower PF          |                   |                       |
| PF Score Q9                      | Lower PF          |                   |                       |
| PUB total score                  | More distress     | More distress     |                       |
| PUB Score Q2                     | More distress     |                   |                       |
| PUB Score Q3                     | More distress     |                   |                       |
| PUB Score Q4                     | More distress     |                   |                       |
| WK Score Q1                      | Less work         |                   |                       |
| FECIS survey                     |                   |                   |                       |
| Q4 – Family faults friends       |                   | Never             |                       |
| Q11 – If upset, family upset     |                   | Almost always     |                       |
| Weight loss readiness test       |                   |                   |                       |
| Q1 – motivated to lose weight    | Less motivated    | Less motivated    | Less motivated        |
| Q2 – certain to stay committed   | Less certain      |                   |                       |
| Total exercise score             | Less exercise     |                   |                       |
| Q22 – exercise brings positivity | More negative     |                   |                       |
| Habits survey                    |                   |                   |                       |
| Q3A – increase protein important |                   | Very important    |                       |
| Q4A – follow dietician important | Not important     |                   |                       |
| Q4B – follow dietician confident | Not confident     |                   |                       |
| Eating Patterns survey           |                   |                   |                       |
| Q4F – no planned meal times      |                   |                   | Yes                   |

**Table S7:** Significant predictors of less weight loss in the preliminary models for all three weight loss phases (i.e. p-value<0.05 after controlling for baseline BMI).

| <b>Direction of association the predicts less weight loss</b> |                          |
|---------------------------------------------------------------|--------------------------|
| Demographics                                                  |                          |
| Age                                                           | Older                    |
| Baseline measures                                             |                          |
| Open versus laparoscopic                                      | Open                     |
| BMI at baseline                                               | Higher                   |
| Waist circumference                                           | Higher                   |
| Pathology                                                     |                          |
| Perivenular fibrosis                                          | Present                  |
| Any type of fibrosis                                          | Present                  |
| Co-morbidities                                                |                          |
| ICD 250.** – diabetes                                         | Active disease present   |
| ICD 272.** – lipids                                           | Active disease present   |
| Medications                                                   |                          |
| Biguanides                                                    | Active use of medication |
| Insulin Sensitizing Agents                                    | Active use of medication |
| Potassium Supplementation                                     | Active use of medication |
| Sulfonylureas                                                 | Active use of medication |
| Labs                                                          |                          |
| Glucose                                                       | Higher                   |
| HbA1c                                                         | Higher                   |
| Iron deficiency*                                              | More deficient           |
| Protein/creatinine ratio                                      | Higher                   |
| Weight loss readiness test                                    |                          |
| Q1 – motivated to lose weight                                 | Less motivated           |

\*Iron deficiency as measured by lab tests including serum iron, serum ferritin, or red cell distribution width

## Regression equations from early weight loss and weight loss nadir

The equation to determine the predicted amount of early %EBWL is:

$$\begin{aligned}
 \text{6-month \%EBWL} = & 58.3 + 43.3*\text{BMI35} + 23.1*\text{BMI40} + 8.9*\text{BMI50} - 8.9*\text{PreEWL1} - 6.3*\text{PreEWL2} - \\
 & 6.5*\text{PreEWL3} - 5.0*\text{PreEWL4} - 5.3*\text{open} - 2.0*\text{age40} - 4.4*\text{age50} - 7.4*\text{age60} + 6.0*\text{waist44} + \\
 & 2.8*\text{waist45} + 0.7*\text{waist50} - 0.3*\text{waist55} - 3.8*\text{preoptime2} - 1.8*\text{CholHDL1} + 0.1*\text{CholHDL2} + \\
 & 2.3*\text{smoker} - 0.3*\text{ComorbBurden} - 1.9*\text{InsSensAgent} - 1.5*\text{PubDistress} - 3.0*\text{anisocytosis} + \\
 & 2.5*\text{commitment} - 8.8*\text{fibrosis}*\text{BMI35} - 8.8*\text{fibrosis}*\text{BMI40} + 2.2*\text{fibrosis}*\text{BMI50} + 2.2*\text{fibrosis}*\text{BMI60}.
 \end{aligned}$$

where, BMI35 = 1 if baseline BMI 35-39.9, else = 0  
 BMI40 = 1 if baseline BMI 40-49.9, else = 0  
 BMI50 = 1 if baseline BMI 50-59.9, else = 0  
 BMI60 = 1 if baseline BMI 60+, else = 0  
 PreEWL1 = 1 if had pre-surgical excess weight gain, else = 0  
 PreEWL2 = 1 if had pre-surgical EWL 0-5%, else = 0  
 PreEWL3 = 1 if had pre-surgical EWL 5-10%, else = 0  
 PreEWL4 = 1 if had pre-surgical EWL 10-19%, else = 0  
 open = 1 if had open surgical approach, else = 0  
 age40 = 1 if age 40-49, else = 0  
 age50 = 1 if age 50-59, else = 0  
 age60 = 1 if age 60+, else = 0  
 waist44 = 1 if waist circumference <45, else = 0  
 waist45 = 1 if waist circumference 45-49, else = 0  
 waist50 = 1 if waist circumference 50-54, else = 0  
 waist55 = 1 if waist circumference 55-59, else = 0  
 preoptime2 = 1 if time from baseline to surgery > 2 years, else = 0  
 CholHDL1 = 1 if cholesterol HDL ratio <4, else = 0  
 CholHDL2 = 1 if cholesterol HDL ratio 4 – 4.9, else = 0  
 smoker = 1 if current smoker or had history of smoking, else = 0  
 ComorbBurden = number of co-morbidities  
 InsSensAgent = 1 if insulin sensitizing agent during pre-op period, else = 0  
 PubDistress = 1 if had low public distress score, else = 0  
 anisocytosis = 1 if had red cell distribution width >15%, else = 0  
 commitment = 1 if extremely certain of commitment to program, else = 0  
 fibrosis = 1 if had any fibrosis on liver pathology, else = 0

The equation to determine the predicted weight loss nadir:

$$\begin{aligned} \%EBWL \text{ nadir} = & 75.1 + 40.8 * BMI35 + 22.4 * BMI40 + 8.7 * BMI50 - 10.3 * PreEWL1 - 6.5 * PreEWL2 - \\ & 7.0 * PreEWL3 - 6.1 * PreEWL4 - 4.4 * Diabetes1 - 8.4 * Diabetes2 - 3.7 * age40 - 5.0 * age50 - \\ & 8.6 * age60 - 3.2 * open + 6.5 * waist44 + 0.4 * waist45 - 1.7 * waist50 - 1.7 * waist55 + 6.2 * bupropion - \\ & 4.6 * IronDef - 3.9 * CholHDL1 - 4.3 * CholHDL2 + 5.1 * motivated - 2.8 * hypertension - \\ & 10.6 * fibrosis * BMI35 - 10.6 * fibrosis * BMI40 - 1.6 * fibrosis * BMI50 - 1.6 * fibrosis * BMI60. \end{aligned}$$

where, BMI35 = 1 if baseline BMI 35-39.9, else = 0

BMI40 = 1 if baseline BMI 40-49.9, else = 0

BMI50 = 1 if baseline BMI 50-59.9, else = 0

BMI60 = 1 if baseline BMI 60+, else = 0

PreEWL1 = 1 if had pre-surgical excess weight gain, else = 0

PreEWL2 = 1 if had pre-surgical EWL 0-5%, else = 0

PreEWL3 = 1 if had pre-surgical EWL 5-10%, else = 0

PreEWL4 = 1 if had pre-surgical EWL 10-19%, else = 0

Diabetes1 = 1 if had pre-surgical diabetes with HbA1c < 9, else = 0

Diabetes2 = 1 if had pre-surgical diabetes with HbA1c 9+, else = 0

age40 = 1 if age 40-49, else = 0

age50 = 1 if age 50-59, else = 0

age60 = 1 if age 60+, else = 0

open = 1 if had open surgical approach, else = 0

waist44 = 1 if waist circumference < 45, else = 0

waist45 = 1 if waist circumference 45-49, else = 0

waist50 = 1 if waist circumference 50-54, else = 0

waist55 = 1 if waist circumference 55-59, else = 0

bupropion = 1 if used bupropion during pre-surgical period, else = 0

IronDef = 1 if low transferrin saturation (male < 15%, female < 12%), else = 0

CholHDL1 = 1 if cholesterol HDL ratio < 4, else = 0

CholHDL2 = 1 if cholesterol HDL ratio 4 – 4.9, else = 0

Motivated = 1 if extremely motivated compared to prior attempts, else = 0

Hypertension = 1 if had pre-surgical hypertension diagnosis, else = 0

fibrosis = 1 if had any fibrosis on liver pathology, else = 0



**Figure S1.** Scatterplot matrix for correlations among short-term, nadir, and long-term weight loss outcomes. As expected, early and nadir, and nadir and long-term are more highly correlated than early and long-term.

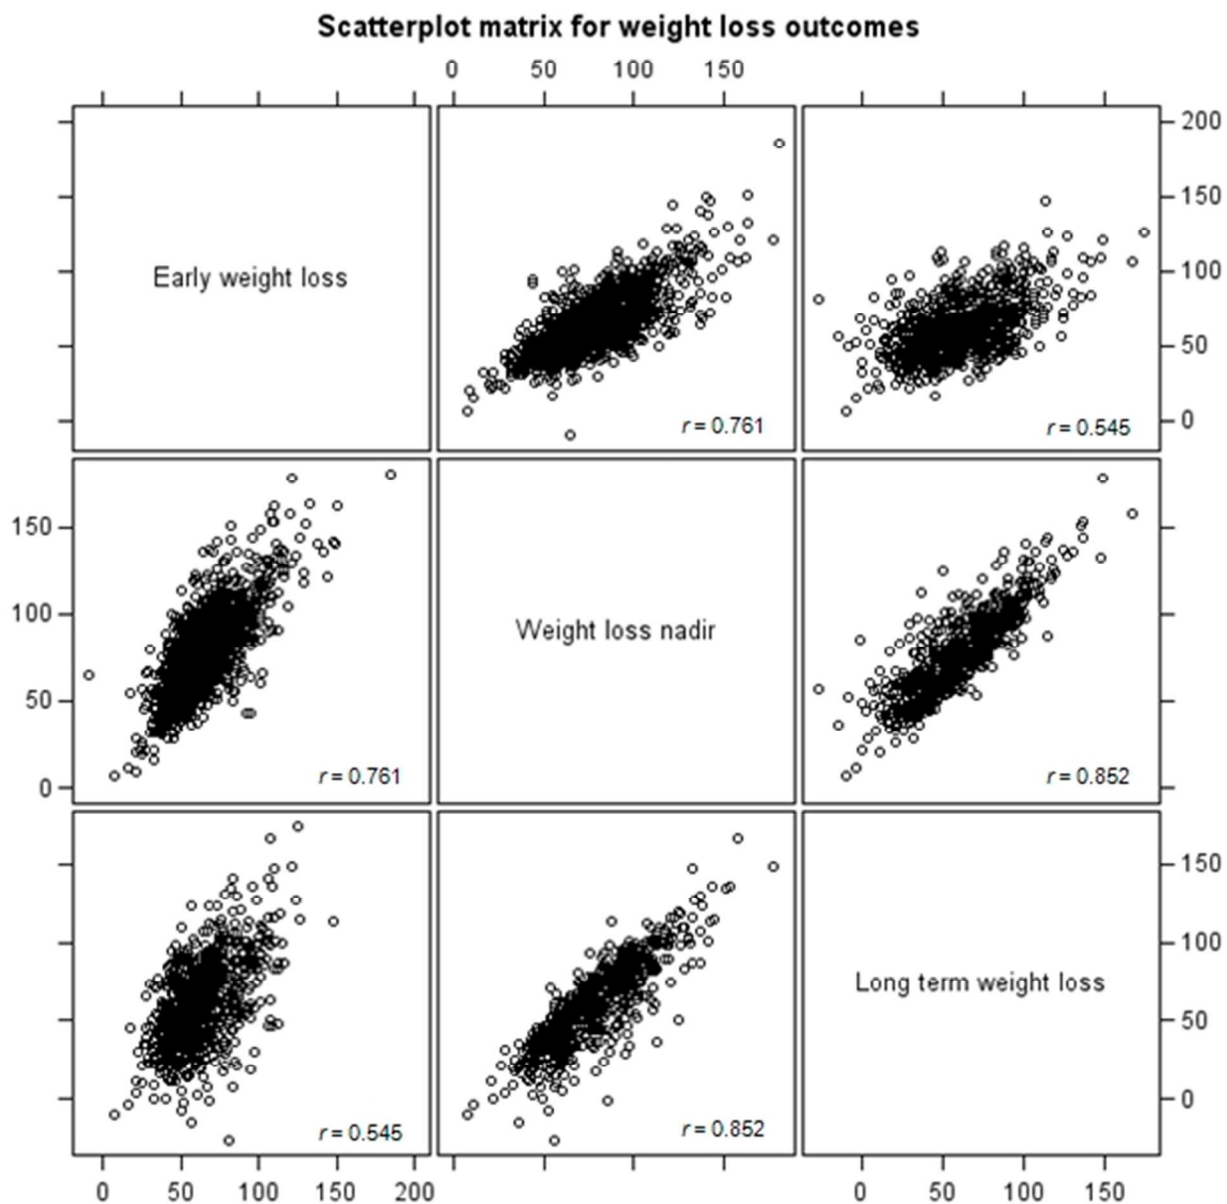

**Figure S2.** Residual plot for long-term weight loss equation. A residual was calculated as the difference between the predicted value for %EBWL and the actual value observed for each patient. This residual was then plotted on the y-axis against the predicted value on the x-axis. The plot indicates that the model is homoscedastic, i.e., that the variation in residuals is independent of the predicted value and that the model is unbiased, i.e., the values of the residuals are independent of the predicted values.

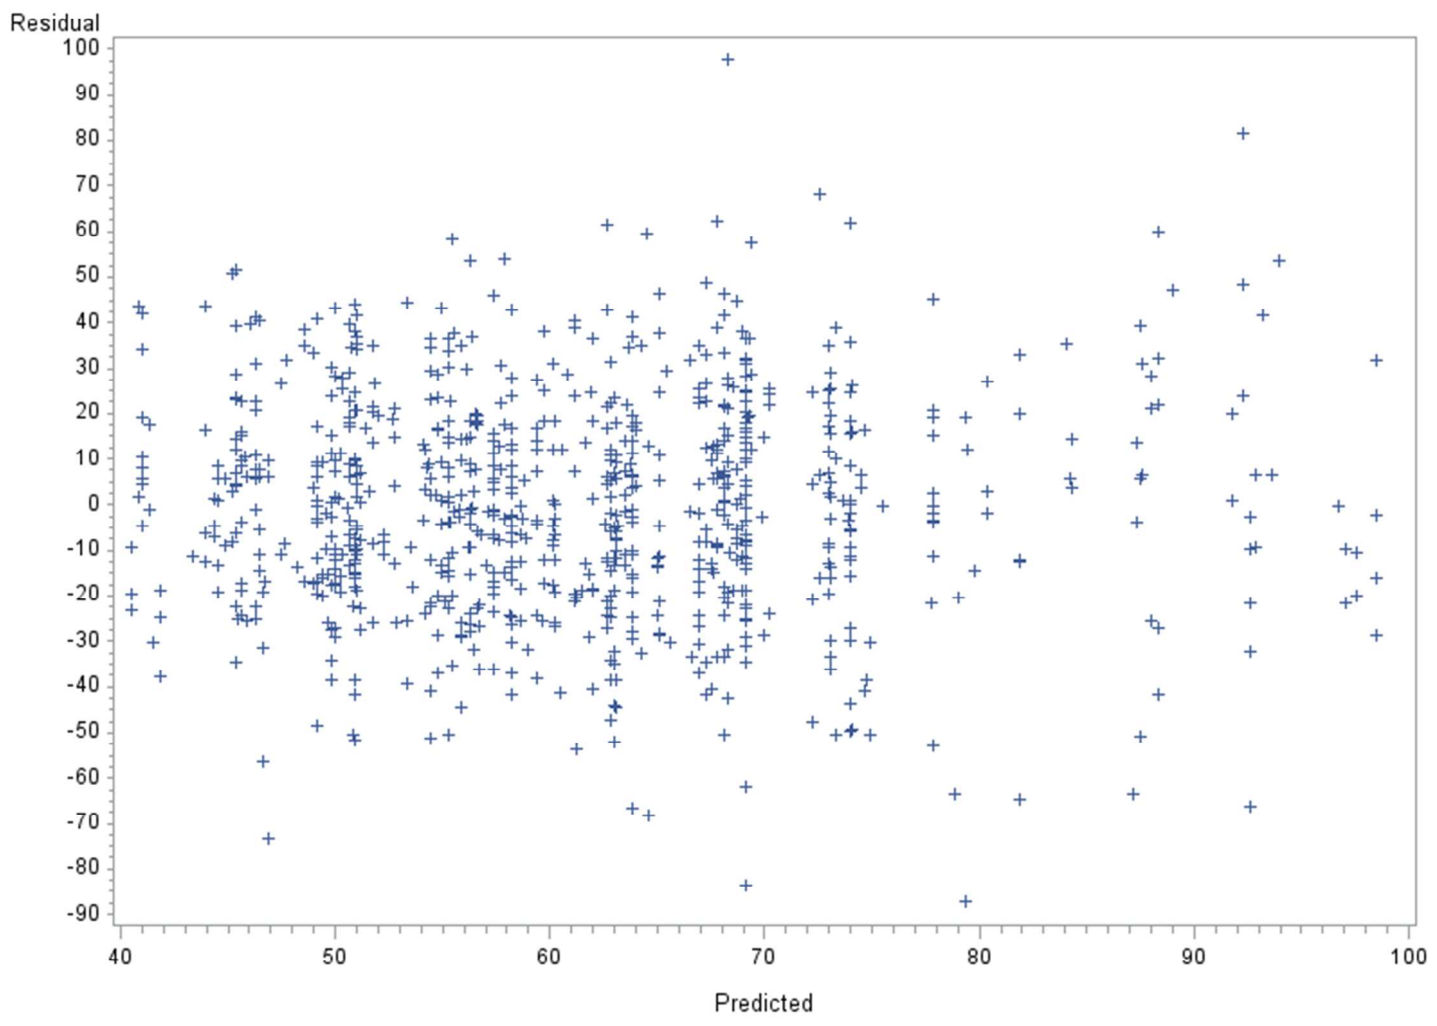

Supplement: NIHMS494386-supplement-01.pdf [file NIHMS494386-supplement-01.pdf]
